# Supplementary material for: Diabetes alters the protein secretome of human adipose‐derived stem cells and promotes tumorigenesis in hepatic cancer cells
Source: PubMed Central journal article supplement (PMC9161878; doi:10.1002/ctm2.823), 2022-06-02
Supplement: CTM2-12-e823-s002.pdf [file CTM2-12-e823-s002.pdf]

|                               | <b>Controls</b> | <b>T2D</b>   |
|-------------------------------|-----------------|--------------|
| <b>n</b>                      | 6               | 6            |
| <b>Sex (M/F)</b>              | (4/2)           | (2/4)        |
| <b>Age (yrs)</b>              | 58.9 ± 5.9      | 62.6 ± 9     |
| <b>BMI (kg/m<sup>2</sup>)</b> | 32.2 ± 3.5      | 31.2 ± 5     |
| <b>HOMA-IR</b>                | 2.9 ± 1.5       | 2.4 ± 2.5    |
| <b>Cholesterol (mg/dl)</b>    | 216 ± 29.2      | 202 ± 30     |
| <b>HDL (mg/dl)</b>            | 55 ± 6.7        | 46.4 ± 12.2  |
| <b>LDL (mg/dl)</b>            | 138.3 ± 14.9    | 122.5 ± 37.5 |
| <b>TG (mg/dl)</b>             | 113.8 ± 14.9    | 192.6 ± 87.1 |

**Table S1. Clinical and laboratory data for the patients included in study.**

Data are presented as mean ± SD. T2D, type 2 diabetes; BMI, body mass index; HOMA-IR, insulin resistance homeostatic model assessment. Differences were analysed by the unpaired *t*-test. \**p*<0.05 vs Control.

**Table S2. Human gene expression Taqman probes.** Results were calculated using the comparative Ct method and expressed relative to the expression of the housekeeping gene 18S.

| <b>Detector</b>   | <b>Taqman probes</b> | <b>Gene probes</b>                   |
|-------------------|----------------------|--------------------------------------|
| Immune regulators |                      |                                      |
| IL1b              | Hs01555410_m1        | Interleukin 1 Beta                   |
| TNF- $\alpha$     | Hs00174128_m1        | Tumor necrosis factor alpha          |
| Invasiveness      |                      |                                      |
| MMP2              | Hs01548727_m1        | Matrix Metalloproteinase-2           |
| MMP9              | Hs00234579_m1        | Matrix Metalloproteinase-9           |
| VIM               | Hs00958111_m1        | Vimentin                             |
| FN1               | Hs01549976_m1        | Fibronectin                          |
| VEGFa             | Hs00900054_m1        | Vascular Endothelial Growth Factor A |
| TGF- $\beta$ 1    | Hs00998133_m1        | Transforming Growth Factor Beta 1    |
| FGF1              | Hs01092738_m1        | Fibroblast growth factor 1           |
| Housekeeping      |                      |                                      |
| 18S rRNA          | Hs03928985_g1        | 18S ribosomal RNA                    |

**Figure S1**

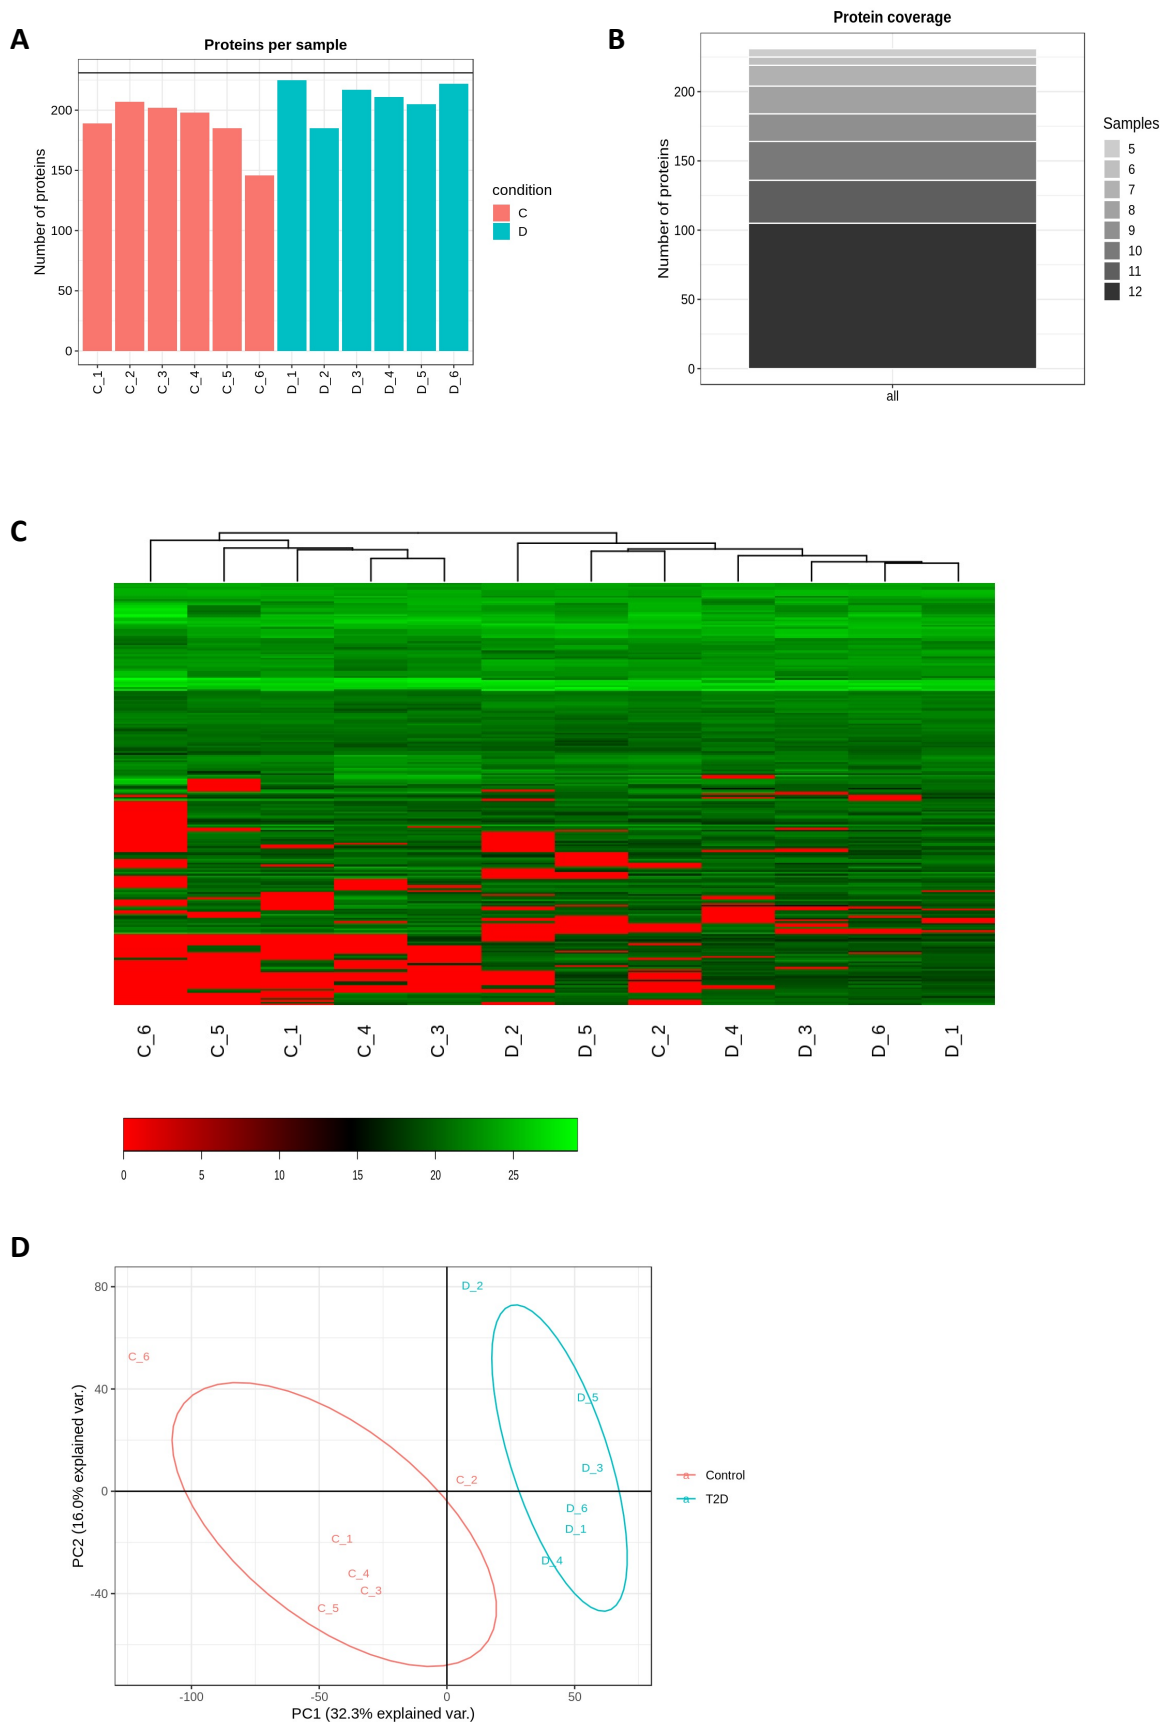

**Figure S1. Inspection data.** Exploratory analysis of proteins detected in at least 5 samples of a group (control or T2D). **A)** Number of proteins identified per sample, the black horizontal line indicates total number of identified proteins. **B)** Protein coverage, accumulated number of identified proteins per sample. **C)** Heat map of all identified proteins. Samples are in the columns and the identified proteins in the rows, dendrogram on top shows sample clustering. **D)** Principal Components Analysis (PCA) of all identified proteins.

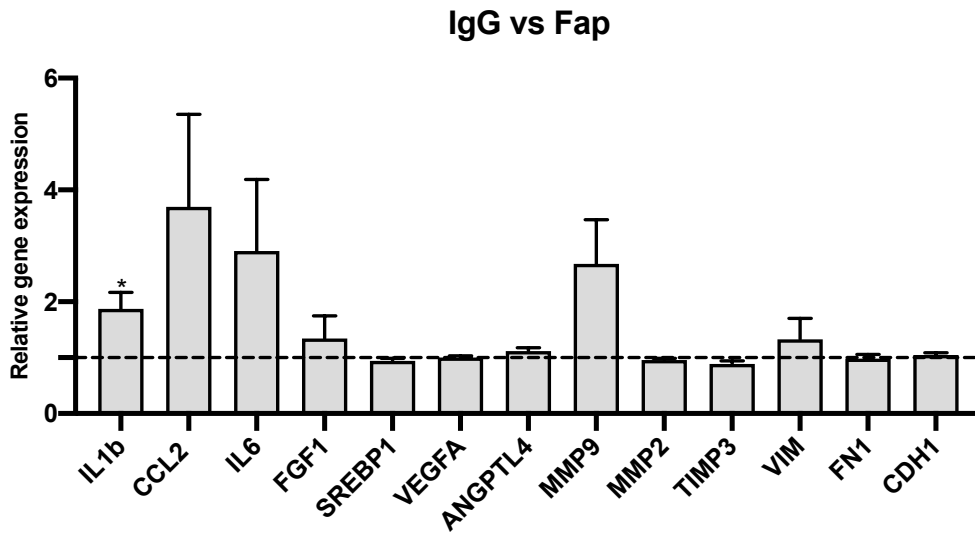

**Figure S2. FAP downregulation has no positive effects on HepG2 cancer cells.** Gene expression analysis of HepG2 cells cultured with CM T2D in the presence of a FAP neutralizing antibody or an IgG control (20 mg IgG/mL). Control values (IgG) were set to 1 (dotted line). n=6. Data are presented as mean  $\pm$  SEM. \*p < 0.05 versus respective control (paired Student's t test).
